# Supplementary material for: Pioneer activity distinguishes activating from non‐activating SOX2 binding sites
Source: PubMed Central journal article supplement (PMC10577566; doi:10.15252/embj.2022113150), 2023-09-11

Related to Fig 1B

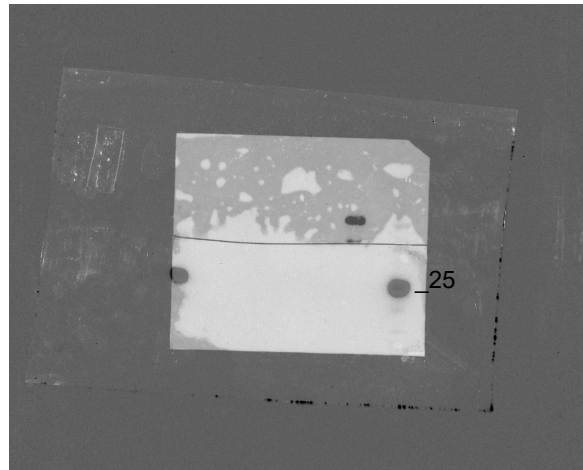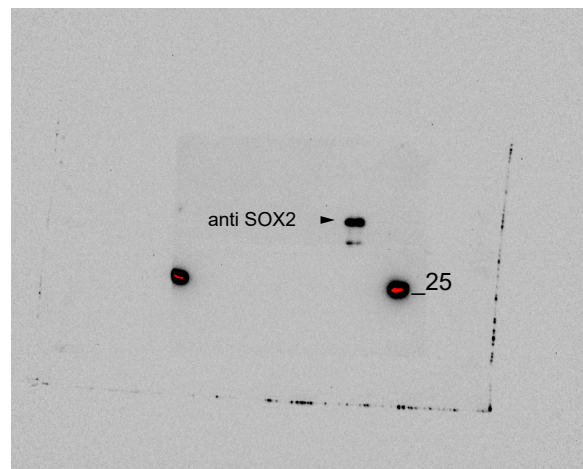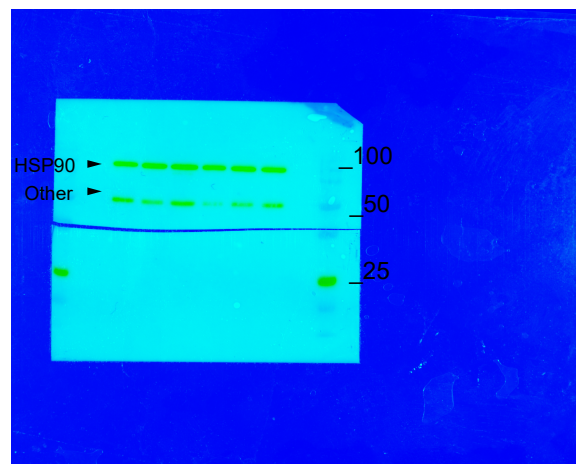

Supplement: EMBJ-42-e113150-s007.pdf [file EMBJ-42-e113150-s007.pdf]
